# Supplementary material
Source: MDPI journal article supplement (https://www.mdpi.com/2073-4352/13/10/1515)
Supplement: s1 [file s1]

## SUPPLEMENTARY INFORMATION

# Substituent Effects in Weak Charge-Transfer Cocrystals of Benzene Derivatives with Classical TCNQ Acceptors: Experimental and Theoretical Study

Shamil Latypov, Anton Fedonin, Kamil Ivshin, Ruzal Zinnatullin, Kirill Metlushka and Olga Kataeva \*

Arbuzov Institute of Organic and Physical Chemistry, FRC Kazan Scientific Center, Russian Academy of Sciences, Arbuzov Str. 8, 420088 Kazan, Russia; lsk@iopc.ru (S.L.); anton.fedonin@mail.ru (A.F.); kamil.ivshin@yandex.ru (K.I.); zruzal94@mail.ru (R.Z.); metlushka@mail.ru (K.M.)

\* Correspondence: [olga-kataeva@yandex.ru](mailto:olga-kataeva@yandex.ru)

## Table of Contents

|                                                                                                                                                                                                                                                                                                      |   |
|------------------------------------------------------------------------------------------------------------------------------------------------------------------------------------------------------------------------------------------------------------------------------------------------------|---|
| <b>Table S1.</b> Crystallographic data and structure refinement details for cocrystals. ....                                                                                                                                                                                                         | 2 |
| <b>Figure S1.</b> Fragments of crystal packing of cocrystal p-xylol/F <sub>1</sub> TCNQ (1:1) showing D-A mixed stacks and the arrangement of molecules within the stacks.....                                                                                                                       | 2 |
| <b>Table S2.</b> The energies (hartree) of HOMO for some benzene derivatives by different methods. ....                                                                                                                                                                                              | 3 |
| <b>Table S3.</b> The energy (E, hartree) of intermolecular pairwise interactions and counterpoise corrected complexation energies ( $\Delta E_{\text{cor}}$ , kcal/mol) for the title dimeric CT complexes in different isomeric forms based on optimizations by different methods (6-31G+(d))...... | 3 |
| <b>Table S3.</b> (Continued).....                                                                                                                                                                                                                                                                    | 4 |
| <b>Table S3.</b> (Continued).....                                                                                                                                                                                                                                                                    | 4 |
| <b>Table S4.</b> The energy (E, hartree) of intermolecular pairwise interactions and counterpoise corrected complexation energies ( $\Delta E_{\text{cor}}$ , kcal/mol) for xylene dimeric complexes in different isomeric forms based on optimizations by different methods (6-31G+(d)). ....       | 5 |
| <b>Table S5.</b> The energy (E, hartree) of intermolecular pairwise interactions and counterpoise corrected complexation energies ( $\Delta E_{\text{cor}}$ , kcal/mol) for toluene dimeric complexes in different isomeric forms based on optimizations by different methods (6-31G+(d)). ....      | 5 |
| <b>Table S6.</b> The counterpoise corrected complexation energies ( $\Delta E_{\text{cor}}$ , kcal/mol) of intermolecular Side-On interactions for the dimeric F <sub>n</sub> -TCNQ (n = 0÷4) complexes based on optimizations by different methods (6-31G+(d))......                                | 6 |

**Table S1.** Crystallographic data and structure refinement details for cocrystals.

| Crystal                                                       | <i>o</i> -Xylol/F <sub>1</sub> TCNQ<br>(1)      | <i>o</i> -Xylol/F <sub>2</sub> TCNQ<br>(2)                    | <i>o</i> -Xylol/F <sub>4</sub> TCNQ<br>(3)                    | <i>p</i> -Xylol/F <sub>1</sub> TCNQ<br>(4)      |
|---------------------------------------------------------------|-------------------------------------------------|---------------------------------------------------------------|---------------------------------------------------------------|-------------------------------------------------|
| Formula                                                       | C <sub>28</sub> H <sub>21</sub> FN <sub>4</sub> | C <sub>20</sub> H <sub>12</sub> F <sub>2</sub> N <sub>4</sub> | C <sub>28</sub> H <sub>20</sub> F <sub>4</sub> N <sub>4</sub> | C <sub>20</sub> H <sub>11</sub> FN <sub>4</sub> |
| CCDC number                                                   | 2295405                                         | 2295404                                                       | 2295403                                                       | 2295406                                         |
| Color                                                         | Dark red                                        | Dark red                                                      | Dark red                                                      | Dark red                                        |
| Habitus                                                       | Prism                                           | Plate                                                         | Plate                                                         | Plate                                           |
| Size (mm)                                                     | 0.140 x 0.193 x<br>0.406                        | 0.058 x 0.142 x<br>0.321                                      | 0.046 x 0.201 x<br>0.401                                      | 0.080 x 0.193 x<br>0.456                        |
| Formula weight                                                | 432.49                                          | 346.34                                                        | 488.48                                                        | 432.49                                          |
| T (K)                                                         | 100(2)                                          | 100(2)                                                        | 100(2)                                                        | 100(2)                                          |
| Crystal system                                                | Triclinic                                       | Monoclinic                                                    | Monoclinic                                                    | Monoclinic                                      |
| Space group                                                   | <i>P</i> -1                                     | <i>P</i> 2 <sub>1</sub> / <i>n</i>                            | <i>P</i> 2 <sub>1</sub> / <i>c</i>                            | <i>Pc</i>                                       |
| <i>a</i> (Å)                                                  | 7.2356(12)                                      | 8.9555(13)                                                    | 12.481 (3)                                                    | 8.6765(8)                                       |
| <i>b</i> (Å)                                                  | 12.6475(19)                                     | 7.1481(11)                                                    | 7.2128(19)                                                    | 7.1797(5)                                       |
| <i>c</i> (Å)                                                  | 12.7998(18)                                     | 27.308(4)                                                     | 13.381 (4)                                                    | 13.6918(11)                                     |
| $\alpha$ (deg)                                                | 98.572(5)                                       | 90                                                            | 90                                                            | 90                                              |
| $\beta$ (deg)                                                 | 90.470(5)                                       | 99.089(5)                                                     | 96.757 (7)                                                    | 103.851(5)                                      |
| $\gamma$ (deg)                                                | 92.882(5)                                       | 90                                                            | 90                                                            | 90                                              |
| <i>V</i> (Å <sup>3</sup> )                                    | 1156.6(3)                                       | 1726.1(5)                                                     | 1196 (5)                                                      | 828.12(12)                                      |
| <i>Z</i>                                                      | 2                                               | 4                                                             | 2                                                             | 2                                               |
| <i>D</i> Calcd (g m <sup>-3</sup> )                           | 1.242                                           | 1.333                                                         | 1.356                                                         | 1.317                                           |
| $\mu$ (mm <sup>-1</sup> )                                     | 0.080                                           | 0.097                                                         | 0.103                                                         | 0.089                                           |
| Reflection<br>collected                                       | 8458                                            | 55367                                                         | 9467                                                          | 22299                                           |
| Unique reflections                                            | 8458                                            | 4504                                                          | 3080                                                          | 3881                                            |
| Reflections<br>observed                                       | 5332                                            | 2667                                                          | 1528                                                          | 2195                                            |
| $\theta$ min, $\theta$ max (°)                                | 1.609, 28.862                                   | 1.510, 28.926                                                 | 3.268, 28.772                                                 | 2.837, 28.739                                   |
| Goodness-of-fit<br>(GOF) on F <sup>2</sup>                    | 1.110                                           | 1.076                                                         | 1.026                                                         | 1.010                                           |
| <i>R</i> 1, <i>wR</i> 2 ( <i>I</i> > 2 $\sigma$ ( <i>I</i> )) | 0.0784, 0.1758                                  | 0.0607, 0.1339                                                | 0.0649, 0.1216                                                | 0.0501, 0.0981                                  |
| <i>R</i> 1, <i>wR</i> 2 (all data)                            | 0.1377, 0.2127                                  | 0.1216, 0.1656                                                | 0.1595, 0.1632                                                | 0.1136, 0.1234                                  |
| Largest peak and<br>hole (e Å <sup>-3</sup> )                 | 0.350 and -0.407                                | 0.263 and -0.237                                              | 0.255 and -0.250                                              | 0.188 and -0.172                                |

**Figure S1.** Fragments of crystal packing of cocrystal *p*-xylol/F<sub>1</sub>TCNQ (1:1) showing D-A mixed stacks and the arrangement of molecules within the stacks.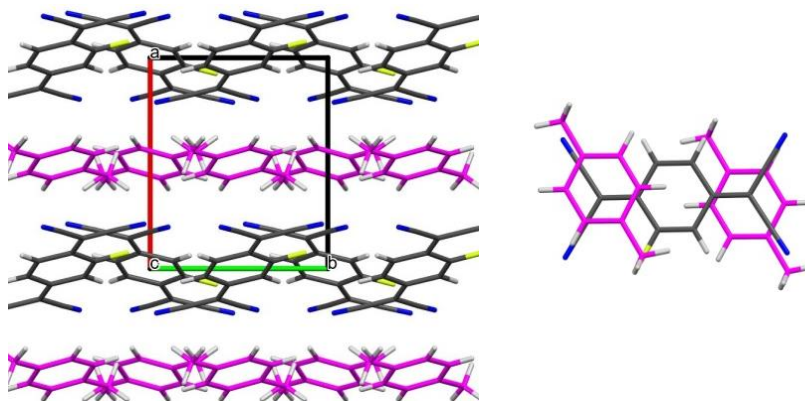

**Table S2.** The energies (hartree) of HOMO for some benzene derivatives by different methods.

| Donor           | PBE0/6-31+G(d) | wB97XD/6-31+G(d) |
|-----------------|----------------|------------------|
| Benzene         | -0.26623       | -0.33070         |
| Toluene         | -0.25372       | -0.31772         |
| <i>o</i> -xylol | -0.24714       | -0.31099         |
| <i>m</i> -xylol | -0.24662       | -0.31057         |
| <i>p</i> -xylol | -0.24268       | -0.30624         |

**Table S3.** The energy (E, hartree) of intermolecular pairwise interactions and counterpoise corrected complexation energies ( $\Delta E_{\text{cor}}$ , kcal/mol) for the title dimeric CT complexes in different isomeric forms based on optimizations by different methods (6-31G+(d)).

**Donor = *o*-xylol**

| Donor               | Coordination type | isomer | PBE0                 | PBE0                    | wB97XD        | wB97XD                  | MP2           | MP2                     |
|---------------------|-------------------|--------|----------------------|-------------------------|---------------|-------------------------|---------------|-------------------------|
| Acceptor            |                   |        | E                    | $\Delta E_{\text{cor}}$ | E             | $\Delta E_{\text{cor}}$ | E             | $\Delta E_{\text{cor}}$ |
| TCNQ                | Exo               | 1      | -988.3195142         | <b>-2.98</b>            | -989.1428264  | <b>-11.2</b>            | -986.4842445  | -9.27                   |
|                     | Endo              | 1      | -988.3186952         | <b>-2.56</b>            | -989.1449728  | <b>-12.78</b>           | -986.4851368  | -9.54                   |
|                     | Endo              | 2      | -988.3186206         |                         | -989.1423364  | <b>-11.26</b>           |               |                         |
|                     | T                 | 1      | -988.3202069         | <b>-3.82</b>            | -989.1383697  | <b>-8.85</b>            |               |                         |
| F <sub>1</sub> TCNQ | Exo               | 1      | <b>-1087.464646</b>  | <b>-3.47</b>            | -1088.3499431 | <b>-12.08</b>           | -1082.0621208 | -10.23                  |
|                     | Exo               | 2      | -1087.4641579        |                         |               |                         |               |                         |
|                     | Endo              | 1      | -1087.4633474        |                         |               |                         |               |                         |
|                     | Endo              | 2      | -1087.4635418        | <b>-2.77</b>            | -1088.3512937 | <b>-13.21</b>           |               |                         |
|                     | T                 | 1      | -1087.4648105        | <b>-4.02</b>            | -1088.3442519 | <b>-9.00</b>            |               |                         |
| F <sub>2</sub> TCNQ | Exo               | 1      | <b>-1186.6083909</b> | <b>-3.78</b>            | -1187.5551311 | <b>-12.47</b>           | -1184.5260806 | -10.81                  |
|                     | Endo              | 1      | -1186.6073856        | <b>-3.23</b>            | -1187.5545846 | <b>-12.53</b>           |               |                         |
| F <sub>4</sub> TCNQ | Exo               | 1      | <b>-1384.8788118</b> | <b>-4.61</b>            | -1385.9483995 | <b>-13.80</b>           | -1382.5487413 | -12.52                  |
|                     | Exo               | 2      | -1384.8780529        |                         |               |                         |               |                         |
|                     | Exo               | 3      | -1384.8775469        |                         |               |                         |               |                         |
|                     | Exo               | 4      | -1384.8774907        |                         |               |                         |               |                         |
|                     | Exo               | 5      | -1384.877486         |                         |               |                         |               |                         |
|                     | Exo               | 6      | -1384.877945         |                         |               |                         |               |                         |
|                     | Exo               | 7      | <b>-1384.878812</b>  |                         |               |                         |               |                         |
|                     | Endo              | 1      | -1384.8780371        | -4.21                   | -1385.9480589 | -14.08                  |               |                         |
|                     | Endo              | 2      | -1384.8779284        |                         |               |                         |               |                         |
|                     | Endo              | 3      | -1384.8779668        |                         |               |                         |               |                         |
|                     | Endo              | 4      | -1384.8779667        |                         |               |                         |               |                         |
|                     | Endo              | 5      | -1384.8777633        |                         |               |                         |               |                         |
|                     | Endo              | 6      | -1384.877602*        |                         |               |                         |               |                         |
|                     | Endo              | 7      | -1384.8777641        |                         |               |                         |               |                         |
|                     | Endo              | 8      | -1384.877676*        |                         |               |                         |               |                         |
|                     | Endo              | 9      | -1384.8779289        |                         |               |                         |               |                         |

Table S3. (Continued)

Donor = *m*-xylol

| Donor               | Coordination type | isomer | PBE0                 | PBE0                    | wB97XD        | wB97XD                  | MP2           | MP2                     |
|---------------------|-------------------|--------|----------------------|-------------------------|---------------|-------------------------|---------------|-------------------------|
| Acceptor            |                   |        | E                    | $\Delta E_{\text{cor}}$ | E             | $\Delta E_{\text{cor}}$ | E             | $\Delta E_{\text{cor}}$ |
| TCNQ                | Exo               | 1      | -988.319260          | <b>-2.78</b>            | -989.1428802  | <b>-11.52</b>           |               |                         |
|                     | Exo               | 2      | -988.319407          | <b>-2.86</b>            | -989.1438275  | <b>-12.09</b>           |               |                         |
|                     | Endo              | 1      | -988.3192323         | <b>-2.79</b>            | -989.1449129  | <b>-12.87</b>           |               |                         |
|                     | Endo              | 2      | Not stable           |                         | -989.1434405  | <b>-12.12</b>           |               |                         |
|                     | T                 | 1      | -988.3204205         | <b>-3.92</b>            | Not stable    | Not stable              |               |                         |
| F <sub>1</sub> TCNQ | Exo               | 1      | <b>-1087.4644365</b> | <b>-3.18</b>            | -1088.3500821 | <b>-12.45</b>           |               |                         |
|                     | Exo               | 2      | -1087.4638334        |                         |               |                         |               |                         |
|                     | Exo               | 3      | -1087.4645618        | <b>3.35</b>             | -1088.3507532 | <b>-12.86</b>           | -1085.5069926 | -10.24                  |
|                     | Endo              | 1      | -1087.4636739        |                         | -1088.3513455 |                         |               |                         |
|                     | Endo              | 2      | -1087.46404          | <b>-3.03</b>            | -1088.3514599 | <b>-13.42</b>           |               |                         |
|                     | T                 | 1      | -1087.4650213        | <b>-4.10</b>            | Not stable    | Not stable              |               |                         |
| F <sub>2</sub> TCNQ | Exo               | 1      | <b>-1186.6080551</b> | <b>-3.45</b>            | -1187.5552281 | <b>-12.83</b>           |               |                         |
|                     | Exo               | 2      | -1186.6081002        | <b>3.55</b>             | -1187.5557796 | <b>-13.14</b>           |               |                         |
|                     | Endo              | 1      | -1186.6077415        | <b>-3.33</b>            | -1187.5541958 | <b>-12.12</b>           |               |                         |
| F <sub>4</sub> TCNQ | Exo               | 1      | -1384.8784747        | -                       | -1385.9484841 | <b>-14.19</b>           |               |                         |
|                     | Exo               | 2      | -1384.878570         |                         |               |                         |               |                         |
|                     | Exo               | 3      | -1384.8785729        |                         |               |                         |               |                         |
|                     | Exo               | 4      | <b>-1384.8785737</b> | 4.36                    | -1385.949211  | <b>14.51</b>            |               |                         |
|                     | Exo               | 5      | -1384.8779328        |                         |               |                         |               |                         |
|                     | Exo               | 6      | -1384.878556         |                         |               |                         |               |                         |
|                     | Exo               | 7      | <b>-1384.878585</b>  | <b>4.49</b>             | -1385.9475773 | <b>13.63</b>            |               |                         |
|                     | Exo               | 8      | -1384.878401         |                         |               |                         |               |                         |
|                     | Endo              | 1      | -1384.8783268        | -4.25                   | -1385.9489626 | <b>-14.75</b>           |               |                         |

Table S3. (Continued)

Donor = *p*-xylol

|                     | Coordination type | isomer | PBE0                 | PBE0                    | wB97XD              | wB97XD                  | MP2           | MP2                     |
|---------------------|-------------------|--------|----------------------|-------------------------|---------------------|-------------------------|---------------|-------------------------|
| Acceptor            |                   |        | E                    | $\Delta E_{\text{cor}}$ | E                   | $\Delta E_{\text{cor}}$ | E             | $\Delta E_{\text{cor}}$ |
| TCNQ                | Exo               | 1      | -988.3192674         | <b>-2.80</b>            | <b>-989.1441452</b> | <b>-12.43</b>           | -986.4862448  | -9.82                   |
|                     | Exo               | 2      | -988.3190197         |                         |                     |                         |               |                         |
|                     | Endo              | 1      | -988.3186304         | <b>-2.60</b>            | <b>-989.1429479</b> | <b>-11.76</b>           | -986.4843512  | -9.20                   |
|                     | T                 | 1      | -988.3202702         | <b>-3.90</b>            | <b>-989.1376659</b> | <b>-8.83</b>            | No stable     |                         |
| F <sub>1</sub> TCNQ | Exo               | 1      | <b>-1087.4645328</b> | <b>-3.37</b>            | -1088.3513131       | <b>-13.32</b>           | -1085.5082144 | -10.78                  |
|                     | Exo               | 2      | -1087.463923         |                         |                     |                         |               |                         |
|                     | Endo              | 1      | -1087.4634066        | <b>-2.81</b>            |                     |                         |               |                         |
|                     | Endo              | 2      | -1087.4635013        | <b>-4.09</b>            | -1088.3497406       | <b>-12.46</b>           |               |                         |
| F <sub>2</sub> TCNQ | T                 | 1      | -1087.4649261        |                         | Not stable          | Not stable              |               |                         |
|                     | Exo               | 1      | <b>-1186.6080267</b> | <b>-3.55</b>            | -1187.556302        | <b>-13.56</b>           | -1382.5502914 | -11.19                  |
| F <sub>4</sub> TCNQ | Endo              | 1      | -1186.6074522        | <b>-3.24</b>            | -1187.5554367       | <b>-13.30</b>           |               |                         |
|                     | Exo               | 1      | <b>-1384.8785207</b> | <b>-4.43</b>            | -1385.9495563       | <b>-14.84</b>           | -1382.5502914 | -12.86                  |
|                     | Exo               | 2      | -1384.8782244        |                         |                     |                         |               |                         |
|                     | Exo               | 3      | -1384.878186         |                         |                     |                         |               |                         |
|                     | Endo              | 1      | -1384.8779319        | -4.11                   |                     |                         |               |                         |
|                     | Endo              | 2      | -1384.878194         | <b>-4.24</b>            | -1385.9491074       | <b>-14.72</b>           |               |                         |

**Table S4.** The energy (E, hartree) of intermolecular pairwise interactions and counterpoise corrected complexation energies ( $\Delta E_{\text{cor}}$ , kcal/mol) for xylene dimeric complexes in different isomeric forms based on optimizations by different methods (6-31G+(d)).

| Aryl            | Dimer                | PBE0<br>E    | PBE0<br>$\Delta E_{\text{cor}}$ | wB97XD<br>E  | wB97XD<br>$\Delta E_{\text{cor}}$ | MP2<br>E     | MP2<br>$\Delta E_{\text{cor}}$ |
|-----------------|----------------------|--------------|---------------------------------|--------------|-----------------------------------|--------------|--------------------------------|
| <i>o</i> -xylol | CH/ $\pi$ Di-stack   | -621.025638  | -1.52                           | -621.587353  | -8.23                             | -619.6498541 | -4.83                          |
|                 | $\pi$ - $\pi$ stack  | Not stable   | Not stable                      | Not stable   | Not stable                        |              |                                |
|                 | CH/ $\pi$ Mono-stack | -621.024118  | -0.79                           | -621.5836192 | -6.06                             |              |                                |
| <i>m</i> -xylol | CH/ $\pi$ Di-stack   | -621.0250963 | -1.19                           | -621.584020  | -6.89                             | -619.6475941 | -3.91                          |
|                 | $\pi$ - $\pi$ -stack | Not stable   | Not stable                      | -621.5856053 | -7.84                             |              |                                |
|                 | CH/ $\pi$ Mono-stack | Not stable   | Not stable                      | Not stable   | Not stable                        |              |                                |
| <i>p</i> -xylol | CH/ $\pi$ Di-stack   | -621.024840  | -1.20                           | -621.5827467 | -6.34                             | -619.6466235 | -3.72                          |
|                 | $\pi$ - $\pi$ -stack | Not stable   | Not stable                      | -621.5827244 | -6.29                             |              |                                |
|                 | CH/ $\pi$ Mono-stack | Not stable   | Not stable                      | Not stable   | Not stable                        |              |                                |

**Table S5.** The energy (E, hartree) of intermolecular pairwise interactions and counterpoise corrected complexation energies ( $\Delta E_{\text{cor}}$ , kcal/mol) for toluene dimeric complexes in different isomeric forms based on optimizations by different methods (6-31G+(d)).

|                              | PBE0<br>E    | PBE0<br>$\Delta E_{\text{cor}}$ | wB97XD<br>E  | wB97XD<br>$\Delta E_{\text{cor}}$ | MP2<br>E     | MP2<br>$\Delta E_{\text{cor}}$ |
|------------------------------|--------------|---------------------------------|--------------|-----------------------------------|--------------|--------------------------------|
| CH/ $\pi$ Di-stack           | -542.486176  | -1.28                           | -542.9687369 | -6.21                             | -541.301746  | -3.53                          |
| $\pi$ - $\pi$ -stack<br>side | Not stable   | Not stable                      | -542.965648  | -4.93                             | -541.3017153 | -2.90                          |
| $\pi$ - $\pi$ stack          | Not stable   | Not stable                      | -542.9639882 | -3.26                             | -541.2983596 | -1.68                          |
| CH/ $\pi$ mono-stack         | Not stable   | Not stable                      | -542.9665078 | -4.91                             | -541.3004881 | -2.82                          |
| T-shaped                     | -542.4853318 | -0.89                           | -542.9646261 | -3.74                             | -541.2978621 | -2.18                          |

**Table S6.** The counterpoise corrected complexation energies ( $\Delta E_{\text{cor}}$ , kcal/mol) of intermolecular Side-On interactions for the dimeric  $F_n$ -TCNQ ( $n = 0 \div 4$ ) complexes based on optimizations by different methods (6-31G+(d)).

|                            | PBE0       | wB97XD     | MP2  | Isomeric pair                                                                         |
|----------------------------|------------|------------|------|---------------------------------------------------------------------------------------|
| TCNQ/TCNQ                  | -5.38      | -7.01      |      |                                                                                       |
| $F_1$ TCNQ/ $F_1$ TCNQ (1) | -5.45      | -7.03      |      | 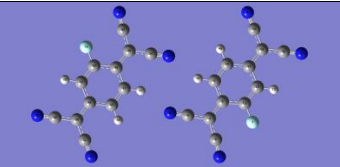   |
| $F_1$ TCNQ/ $F_1$ TCNQ (2) | -4.81      | -6.30      |      |    |
| $F_1$ TCNQ/ $F_1$ TCNQ (3) | -5.62      | -7.33      | 6.50 |    |
| $F_2$ TCNQ/ $F_2$ TCNQ (1) | -4.78      | -6.29      |      |   |
| $F_2$ TCNQ/ $F_2$ TCNQ (2) | -2.99      | Not stable |      |  |
| $F_4$ TCNQ/ $F_4$ TCNQ     | Not stable | Not stable |      |                                                                                       |
